# Supplementary material
Source: PubMed Central journal article supplement (PMC4926317)

**Supplemental Table 1.** Mate Pair sequencing data statistics.

| Sample Name    | Illumina Machine | Number of Lanes | Total Fragments | Fragments not mapped (%) | Replication (%) | Bridged Coverage (X) | Base Coverage (X) | Average MP Fragment (bp) |
|----------------|------------------|-----------------|-----------------|--------------------------|-----------------|----------------------|-------------------|--------------------------|
| PA21           | HiSeq+           | 0.5             | 90,447,078      | 7.7                      | 10.6            | 39                   | 5                 | 2243                     |
| PA29           | HiSeq+           | 0.5             | 92,893,065      | 8.2                      | 11.8            | 31                   | 5                 | 1768                     |
| PA30           | HiSeq+           | 0.5             | 100,071,528     | 10.0                     | 9.9             | 34                   | 6                 | 1781                     |
| PA32           | HiSeq+           | 0.5             | 68,402,027      | 10.5                     | 10.0            | 27                   | 4                 | 2197                     |
| PA33           | HiSeq+           | 0.5             | 105,973,848     | 5.5                      | 5.5             | 30                   | 7                 | 1363                     |
| PA34           | HiSeq+           | 0.5             | 87,340,065      | 15.1                     | 15.8            | 31                   | 4                 | 2217                     |
| PA37           | HiSeq+           | 0.5             | 78,585,214      | 10.0                     | 12.9            | 33                   | 4                 | 2353                     |
| PA40           | HiSeq+           | 0.5             | 52,841,401      | 7.9                      | 7.3             | 22                   | 3                 | 2117                     |
| PA41           | HiSeq+           | 0.5             | 61,168,973      | 18.2                     | 7.7             | 21                   | 3                 | 1991                     |
| PA42           | HiSeq+           | 0.5             | 95,373,534      | 8.9                      | 9.6             | 35                   | 5                 | 2004                     |
| PA44           | HiSeq+           | 0.5             | 86,695,601      | 13.9                     | 12.3            | 33                   | 5                 | 2169                     |
| PA54           | HiSeq+           | 0.5             | 86,264,189      | 12.2                     | 13.5            | 32                   | 4                 | 2116                     |
| PA56           | HiSeq+           | 0.5             | 90,537,963      | 6.5                      | 8.1             | 36                   | 5                 | 2015                     |
| PA62           | HiSeq+           | 0.5             | 96,787,007      | 18.5                     | 20.0            | 31                   | 4                 | 2233                     |
| PA63           | HiSeq+           | 0.5             | 87,997,120      | 12.3                     | 23.4            | 28                   | 4                 | 2019                     |
| <i>average</i> |                  |                 | 85,425,241      | 11                       | 12              | 31                   | 5                 | 2,039                    |

# Supplemental Figure 1. G12/G13 KRAS Mutations in PDAC Tumors

A Summary of KRAS mutations detected in each tumor by Sanger sequencing.

|       | G12 Codon |   |   | G13 Codon |   |   |      |      |
|-------|-----------|---|---|-----------|---|---|------|------|
| PAX18 | G         | G | T | G         | G | C | G12  | G13  |
| PA29  | G         | G | T | G         | A | C | G12  | G13D |
| PA33  | G         | T | T | G         | G | C | G12V | G13  |
| PA37  | G         | T | T | G         | G | C | G12V | G13  |
| PA41  | G         | T | T | G         | G | C | G12V | G13  |
| PA44  | G         | T | T | G         | G | C | G12V | G13  |
| PA56  | G         | T | T | G         | G | C | G12V | G13  |
| PAX04 | G         | T | T | G         | G | C | G12V | G13  |
| PAX14 | G         | T | T | G         | G | C | G12V | G13  |
| PAX15 | G         | T | T | G         | G | C | G12V | G13  |
| PAX22 | G         | T | T | G         | G | C | G12V | G13  |
| PAX27 | G         | T | T | G         | G | C | G12V | G13  |

  

|         | G12 Codon |   |   | G13 Codon |   |   |      |     |
|---------|-----------|---|---|-----------|---|---|------|-----|
| PA62    | T         | G | T | G         | G | C | G12C | G13 |
| PAX05   | T         | G | T | G         | G | C | G12C | G13 |
| PA32    | C         | G | T | G         | G | C | G12R | G13 |
| PAX12   | C         | G | T | G         | G | C | G12R | G13 |
| PAX46   | C         | G | T | G         | G | C | G12R | G13 |
| PA34    | G         | A | T | G         | G | C | G12D | G13 |
| PA40    | G         | A | T | G         | G | C | G12D | G13 |
| PA42    | G         | A | T | G         | G | C | G12D | G13 |
| PA54    | G         | A | T | G         | G | C | G12D | G13 |
| PA63    | G         | A | T | G         | G | C | G12D | G13 |
| PA21/30 | G         | A | T | G         | G | C | G12D | G13 |
| PAX51   | G         | A | T | G         | G | C | G12D | G13 |

B

\* = Both Strands Mut'd

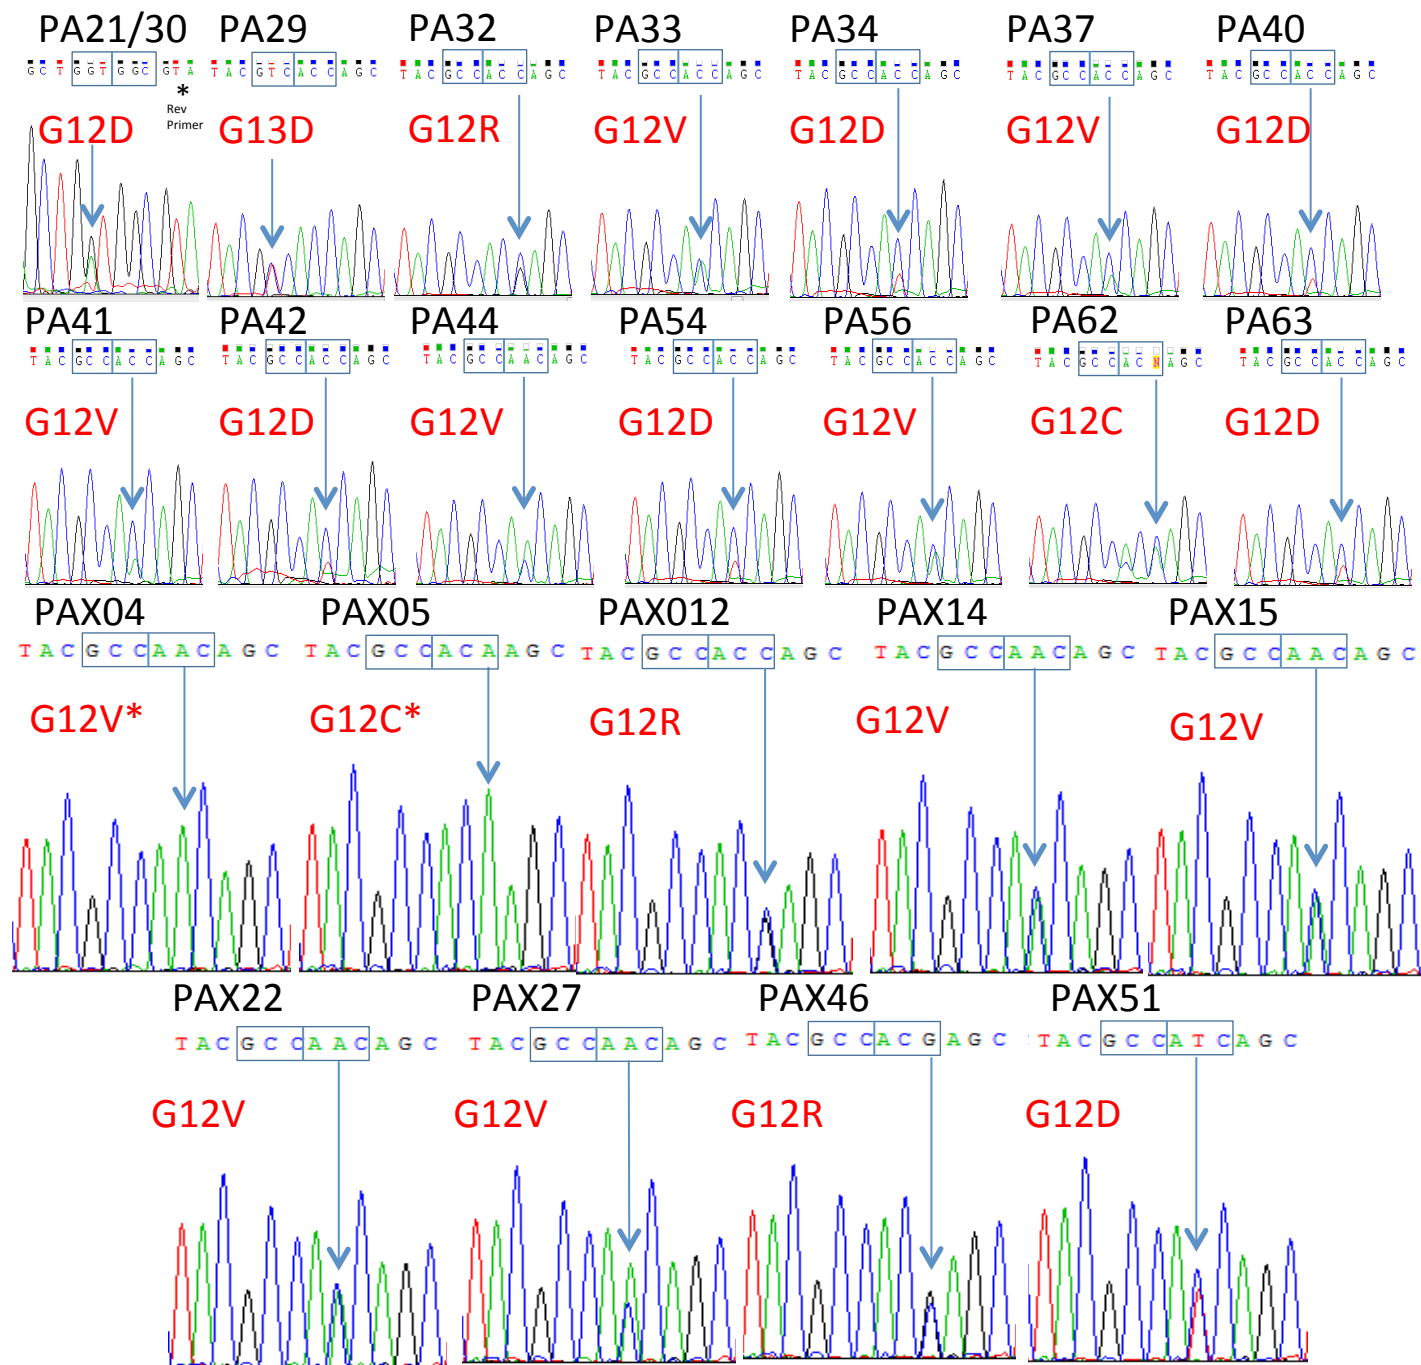

# Supplemental Figure 2A. CNV at the SMAD4 Locus

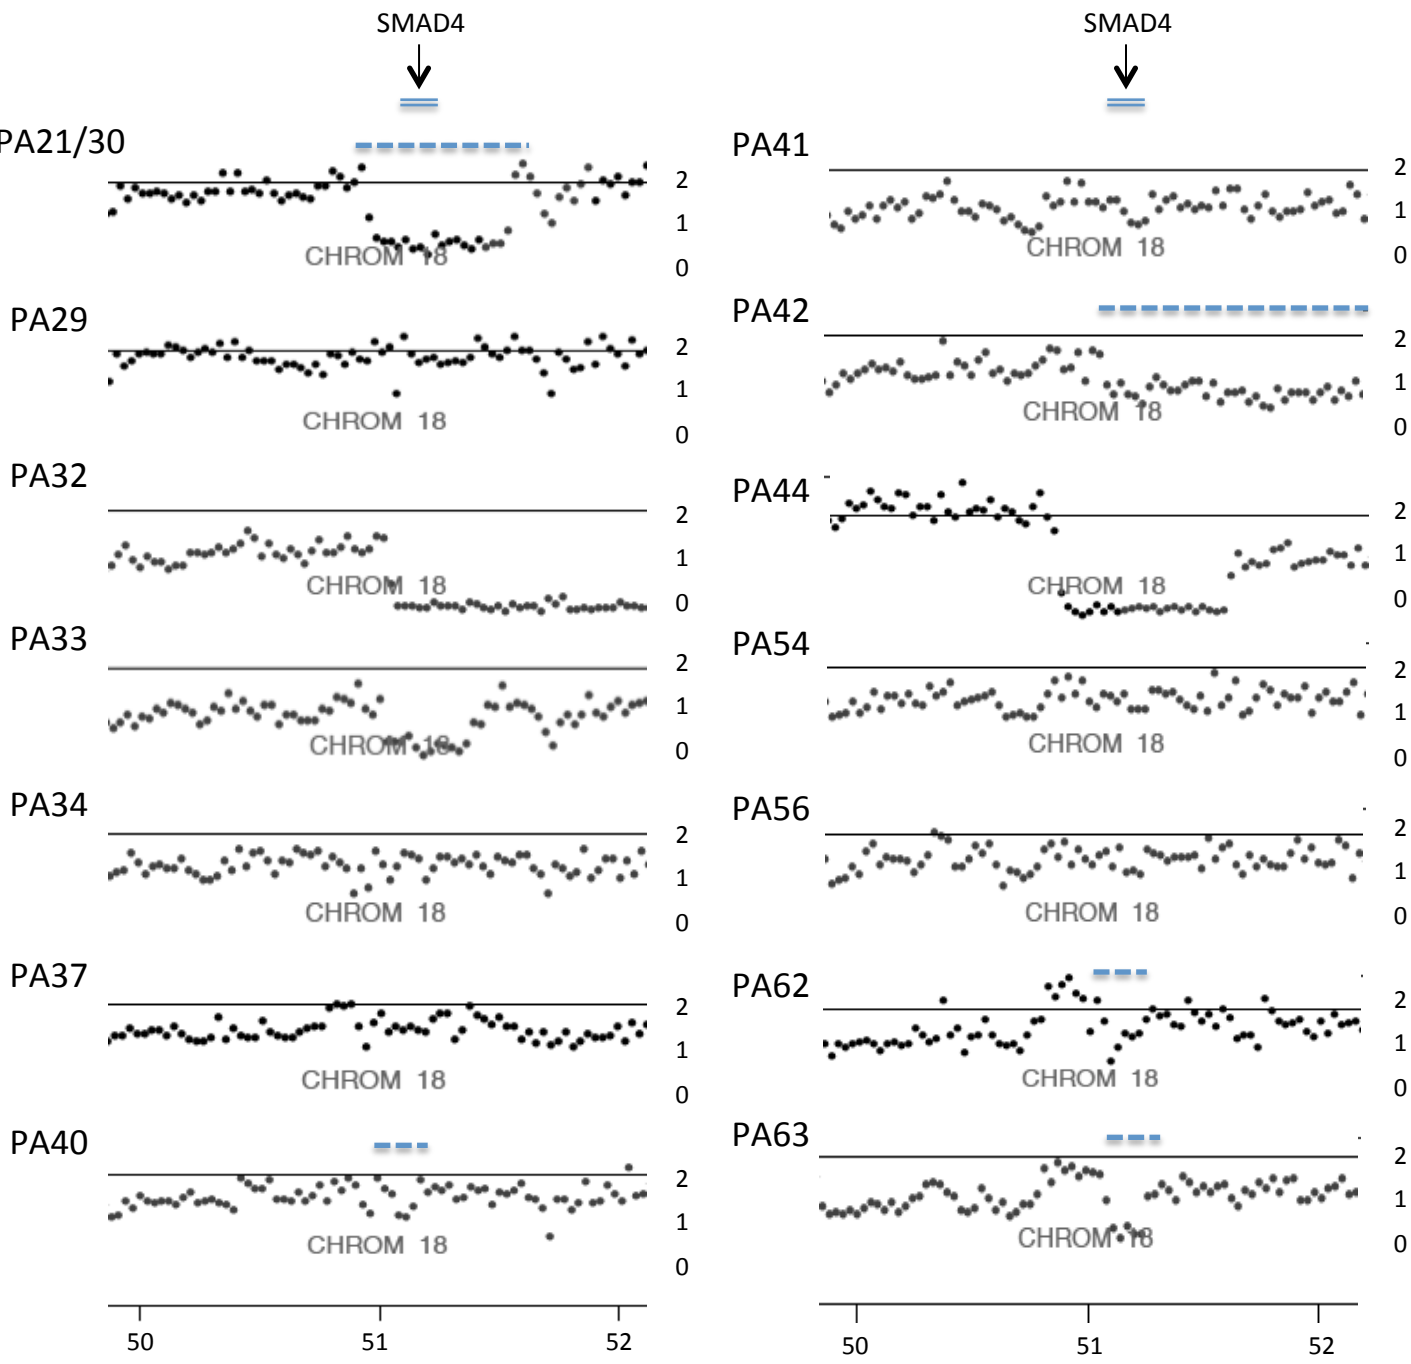

# Supplemental Figure 2B. CNV of Chromosome 18

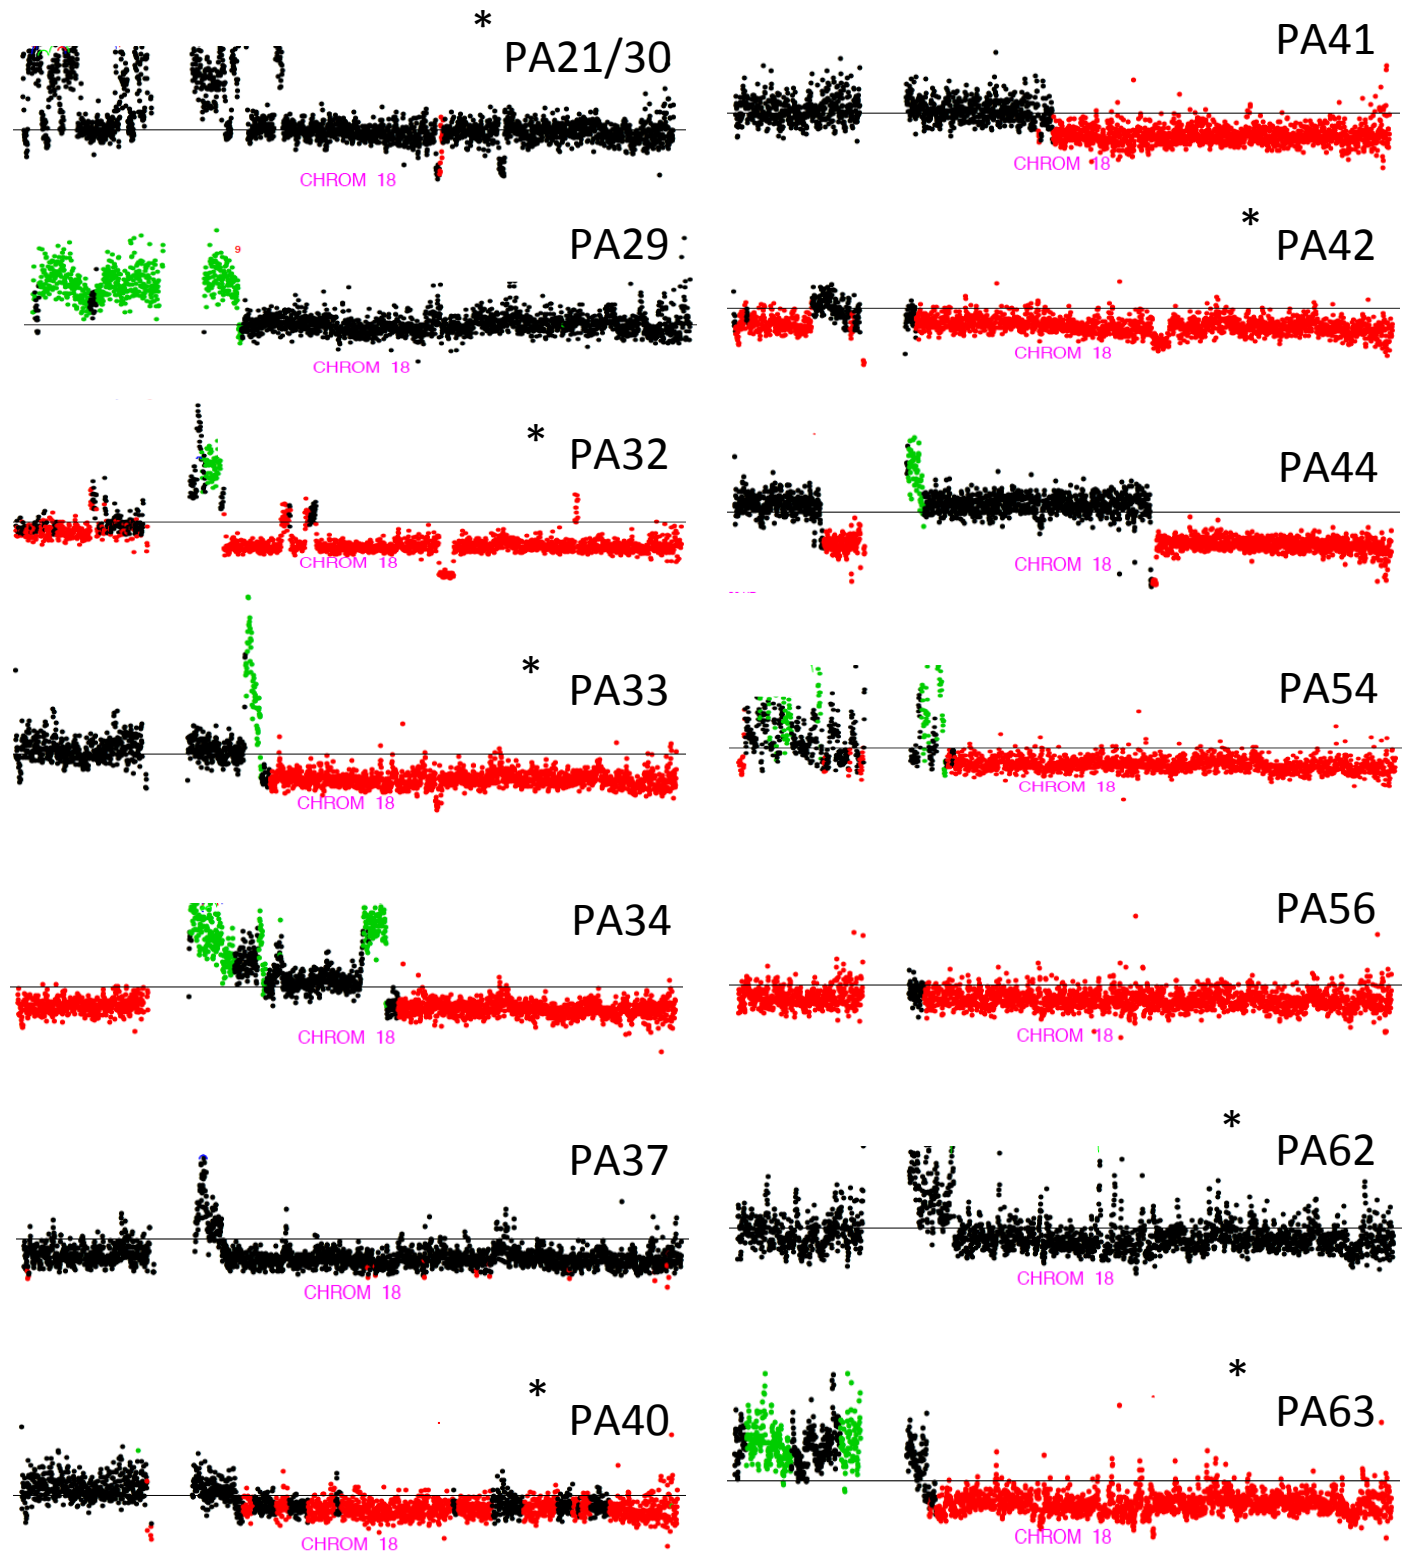

# Supplemental Figure 2C. CNV at the FHIT locus.

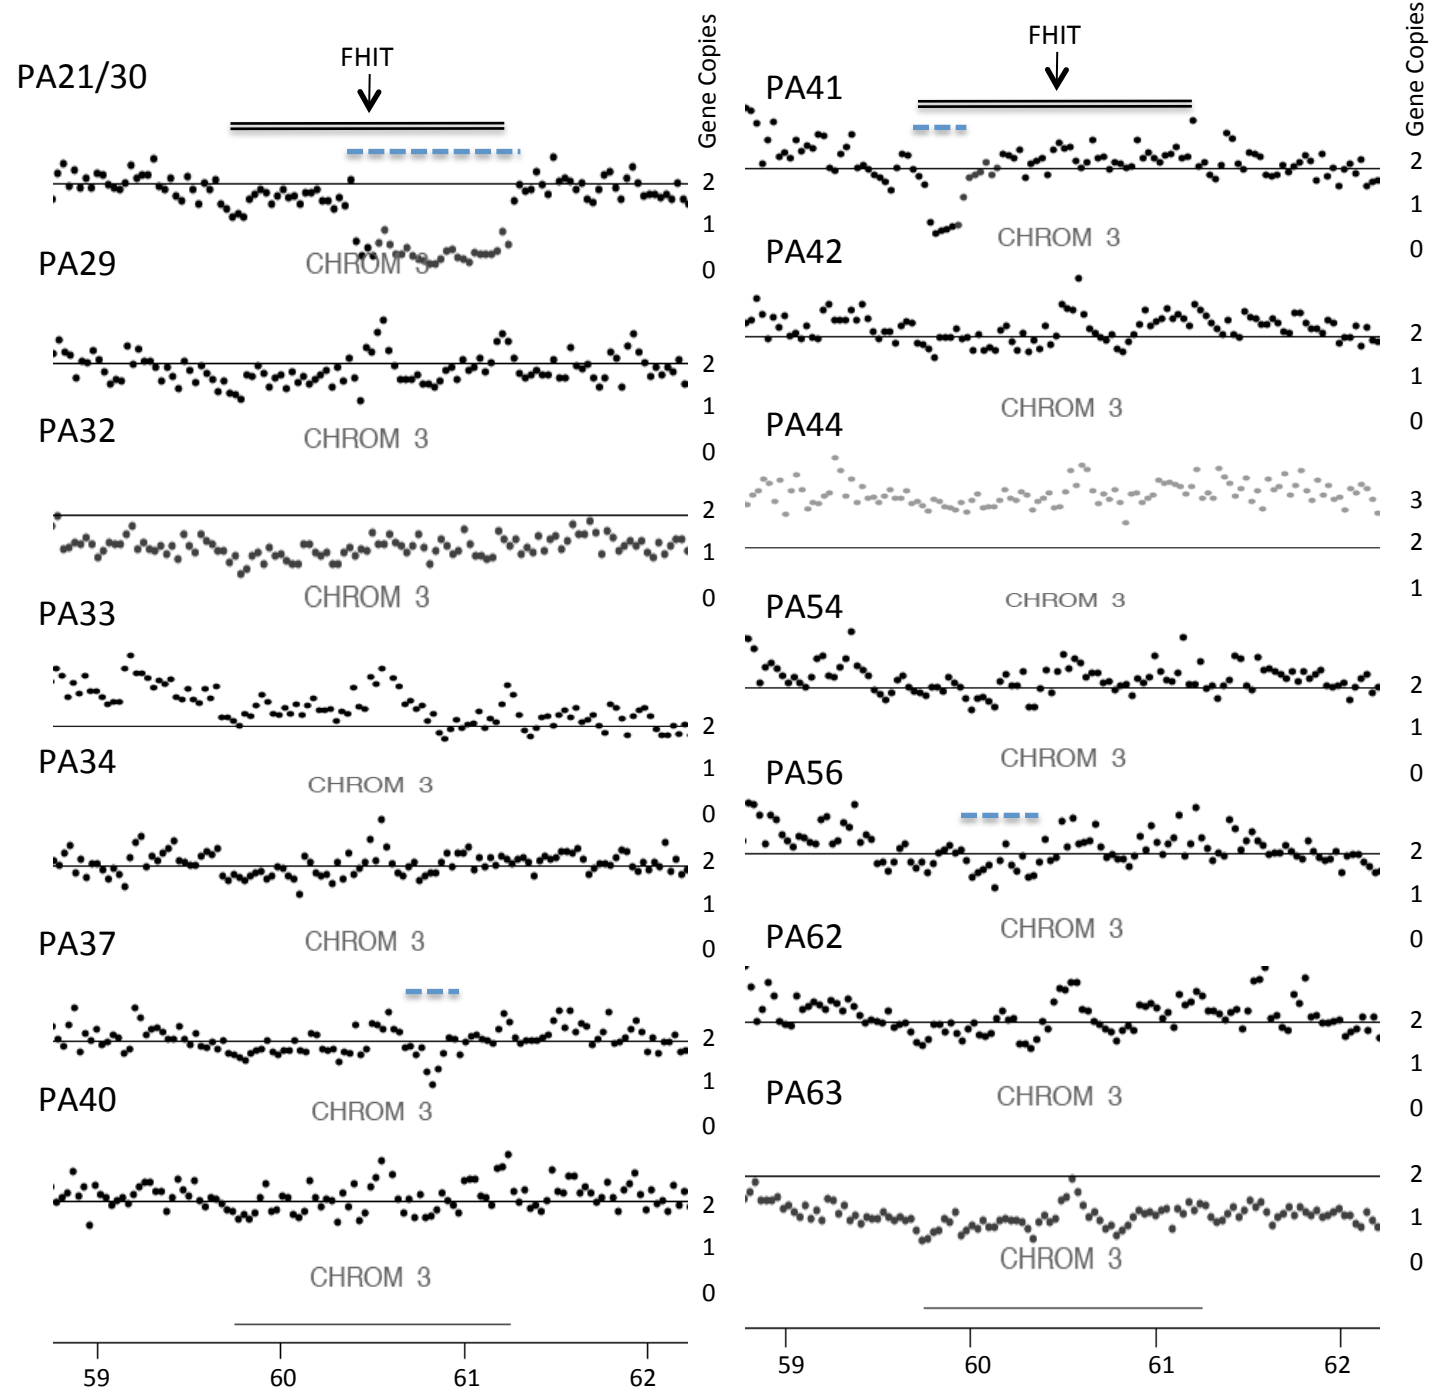

# Supplemental Figure 2D. CNV at the ZNF521 locus.

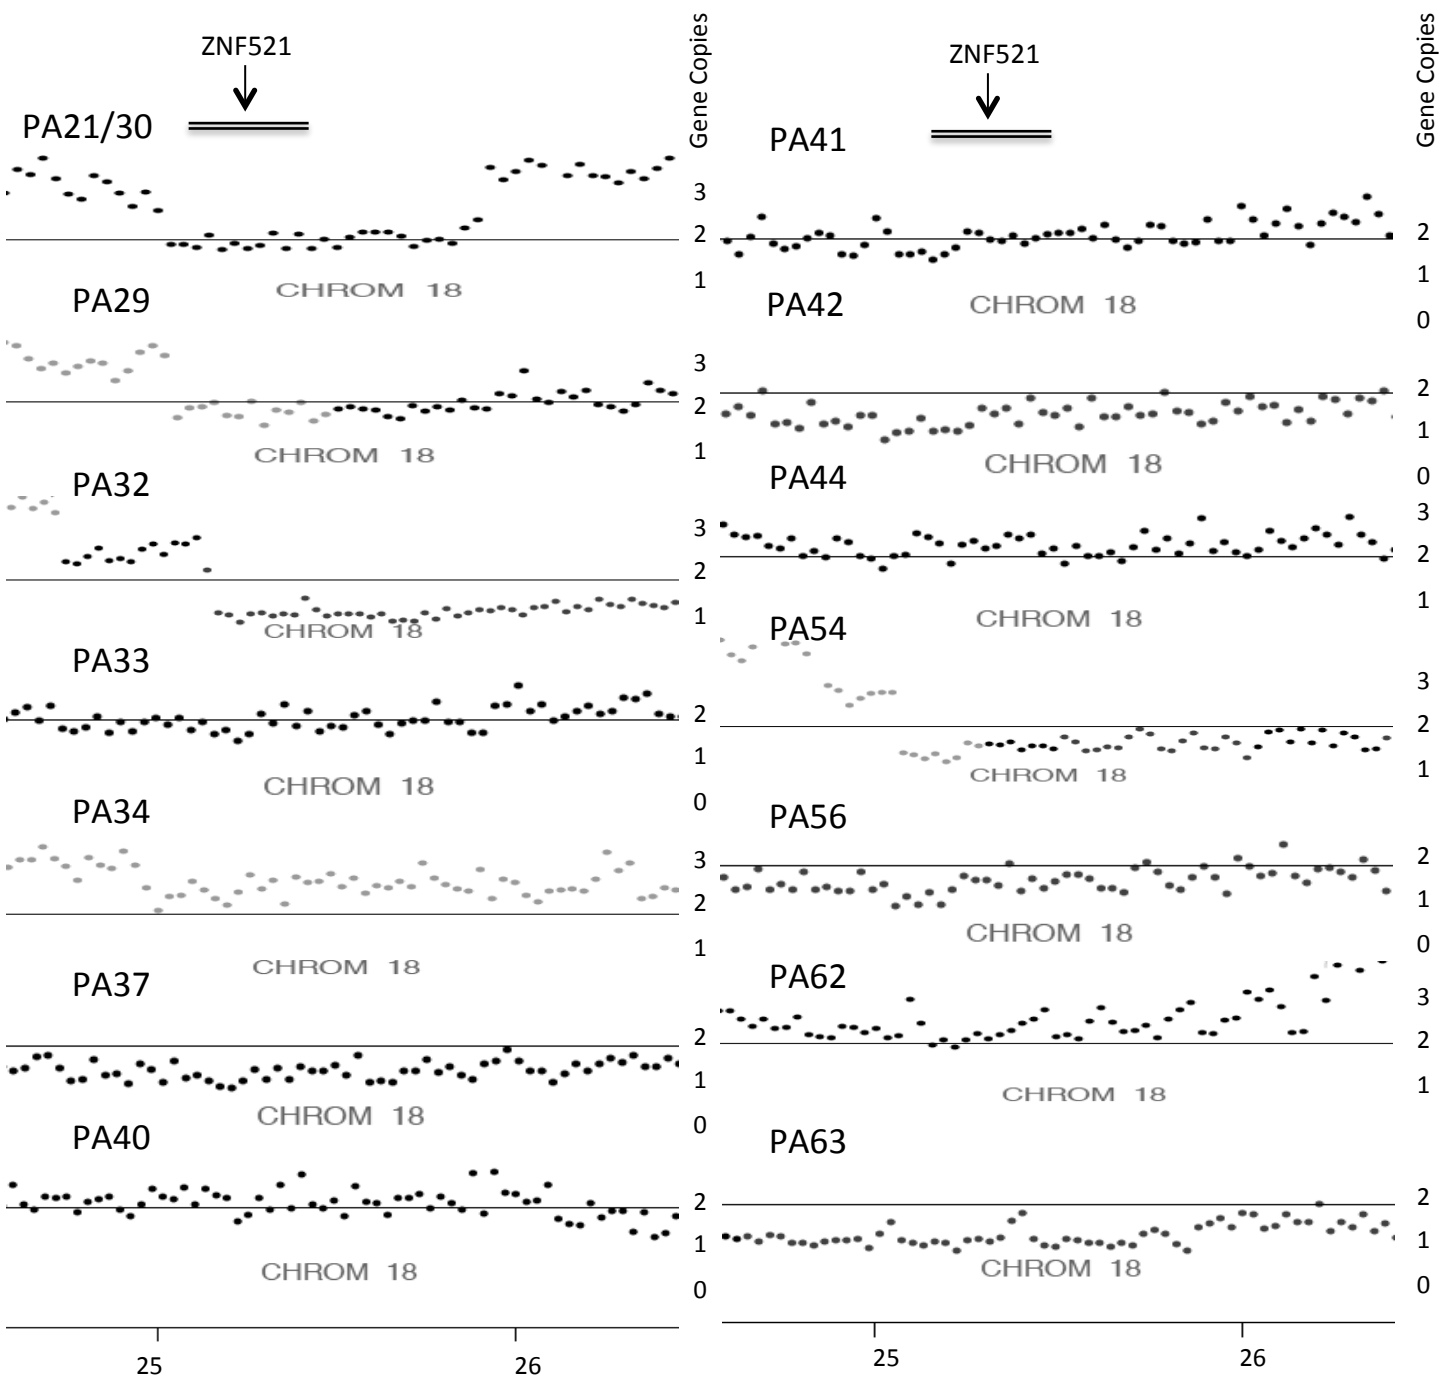

# Supplemental Figure 2E. PAX Tissues

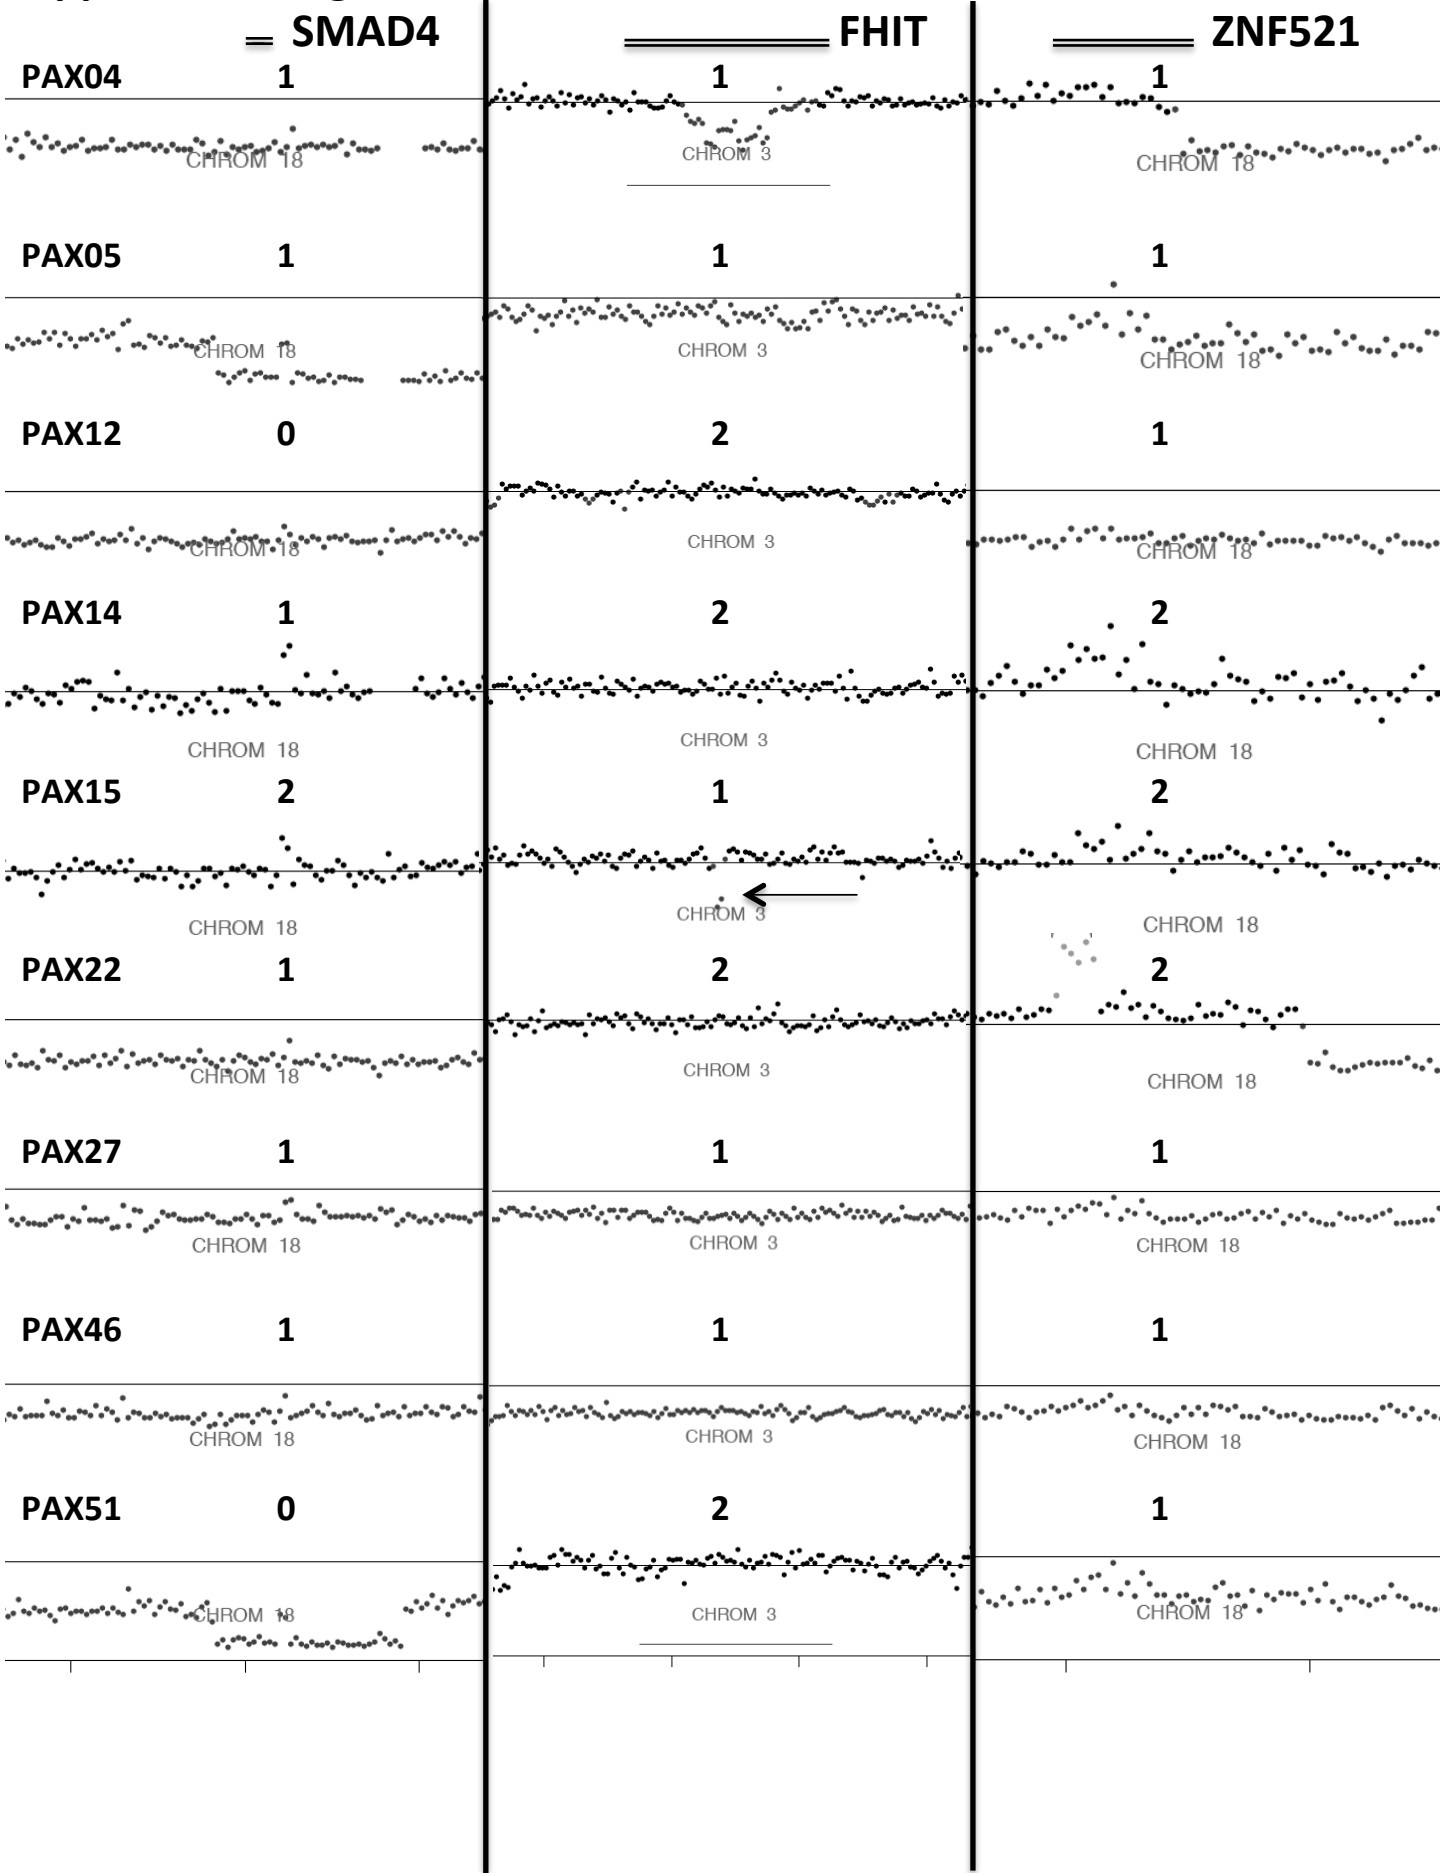

**Supplemental Figure 4.** TGFbeta activated genes.

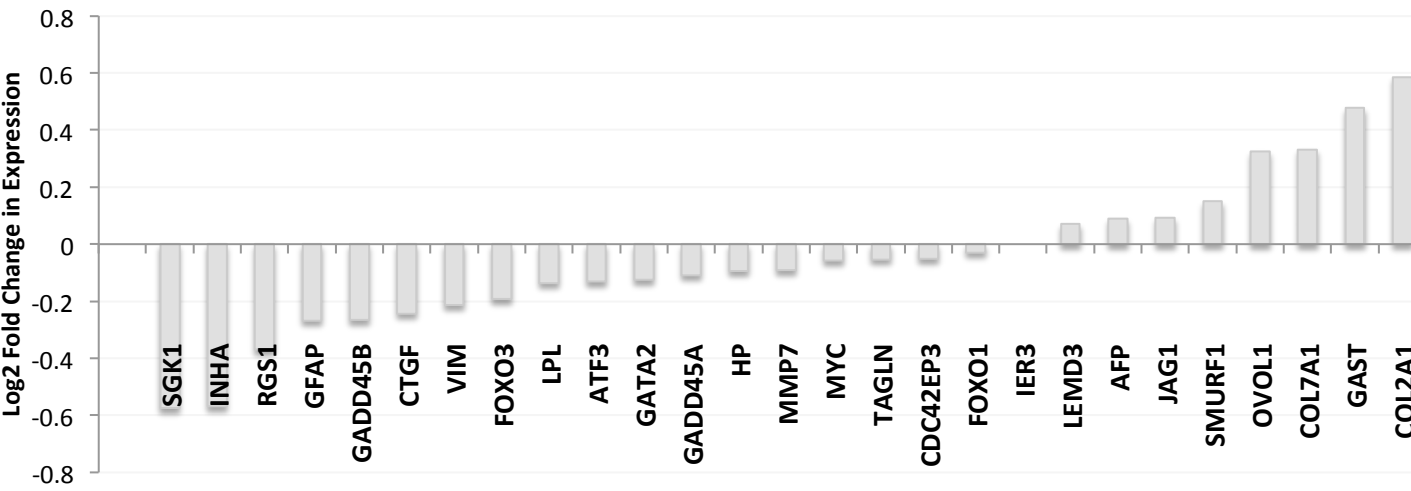

Supplement: NIHMS791774-supplement-SuppFigs-Table1.pdf [file NIHMS791774-supplement-SuppFigs-Table1.pdf]
